# Supplementary material for: Genome-wide association study of self-reported food reactions in Japanese identifies shrimp and peach specific loci in the HLA-DR/DQ gene region
Source: PubMed Central journal article supplement (PMC5773682; doi:10.1038/s41598-017-18241-w), 2018-01-18
Supplement: 41598_2017_18241_MOESM1_ESM.pdf [file 41598_2017_18241_MOESM1_ESM.pdf]

# Supplementary Information for:

## Genome-wide association study of self-reported food reactions in Japanese identifies shrimp and peach specific loci in the *HLA-DRI/DQ* gene region

Seik Soon Khor<sup>1</sup>, Ryoko Morino<sup>2</sup>, Kazuyuki Nakazono<sup>3</sup>, Shigeo Kamitsuji<sup>3</sup>, Masanori Akita<sup>2</sup>, Maiko Kawajiri<sup>2</sup>, Tatsuya Yamasaki<sup>4</sup>, Azusa Kami<sup>2</sup>, Yuria Hoshi<sup>4</sup>, Asami Tada<sup>2</sup>, Kenichi Ishikawa<sup>2</sup>, Maaya Hine<sup>5</sup>, Miki Kobayashi<sup>5</sup>, Nami Kurume<sup>5</sup>, Naoyuki Kamatani<sup>3</sup>, Katsushi Tokunaga<sup>1</sup>, and Todd A. Johnson<sup>3,\*</sup>

<sup>1</sup>Department of Human Genetics, Graduate School of Medicine, The University of Tokyo, Tokyo, 113-0033, Japan

<sup>2</sup>EverGene Ltd., Shinjuku-ku, Tokyo, 163-1435, Japan

<sup>3</sup>StaGen Co., Ltd., Taito-ku, Tokyo, 111-0051, Japan

<sup>4</sup>Life Science Group, Healthcare Division, Department of Healthcare Business, MTI Ltd., Shinjuku-ku, Tokyo, 163-1435, Japan

<sup>5</sup>LunaLuna Division, Department of Healthcare Business, MTI Ltd., Shinjuku-ku, Tokyo, 163-1435, Japan

\* Corresponding author

E-mail: [todd.johnson@stagen.co.jp](mailto:todd.johnson@stagen.co.jp) (TAJ)

# Table of Contents

|                                                                                                         |          |
|---------------------------------------------------------------------------------------------------------|----------|
| <b>Supplementary Datasets</b> .....                                                                     | <b>3</b> |
| <b>Dataset S1. Peach allergy GWAS summary statistics</b> .....                                          | <b>3</b> |
| <b>Dataset S2. Shrimp allergy GWAS summary statistics</b> .....                                         | <b>3</b> |
| <b>Supplementary Tables</b> .....                                                                       | <b>4</b> |
| <b>Table S1. Demographic information for 27 foods</b> .....                                             | <b>4</b> |
| <b>Table S2. RPE analysis of HLA haplotypes with peach allergy in Japanese population</b> .....         | <b>4</b> |
| <b>Table S3. RPE analysis of HLA haplotypes with shrimp allergy in Japanese population</b> .....        | <b>4</b> |
| <b>Supplementary Worksheets</b> .....                                                                   | <b>5</b> |
| <b>Worksheet S1. Summary of GWAS statistics and annotations for association signals</b> .....           | <b>5</b> |
| <b>Worksheet S2. GWAS statistics and annotation of top peach allergy associated SNPs</b> .....          | <b>5</b> |
| <b>Worksheet S3. GWAS statistics and annotation of top shrimp allergy associated SNPs</b> .....         | <b>5</b> |
| <b>Worksheet S4. Summary of top genes for eQTLs that overlap food allergy associated variants</b> ..... | <b>5</b> |
| <b>Worksheet S5. Summary of eQTLs that overlap peach allergy associated SNPs</b> .....                  | <b>5</b> |
| <b>Worksheet S6. Summary of eQTLs that overlap shrimp allergy associated SNPs</b> .....                 | <b>5</b> |
| <b>Supplementary Figures</b> .....                                                                      | <b>6</b> |
| <b>Figure S1. Population structure analysis</b> .....                                                   | <b>6</b> |
| <b>Figure S2. QQ plots of genome-wide meta-analysis association statistics</b> .....                    | <b>7</b> |
| <b>Figure S3. Study design flowchart</b> .....                                                          | <b>8</b> |
| <b>Figure S4. World distribution of top peach allergy associated HLA alleles and haplotype</b> .....    | <b>9</b> |
| <b>Figure S5. World distribution of top shrimp allergy associated HLA alleles and haplotype</b> ...10   |          |
| <b>Figure S6. HLA-DQA2 and HLA-DQB2 expression is largely restricted to Langerhans cells</b> ..11       |          |

## Supplementary Datasets

Zipped archives of tabbed text files of GWAS summary statistics for genome-wide genotyped SNPs plus imputed variants in the chromosome 6 MHC region.

### Common columns:

regional.analysis: Status flag with 0 if SNP data comes from GWAS micro-array data or 1 if SNP lies in imputed region.

CHR: Chromosomes numbered 1-23 for autosomes and chrX.

BP: Basepair position in hg19 coordinates

rsid: dbSNP147 rsID or concatenated ID with chrNN:BP.A2.A1

A1: Effect-allele and non-reference (alternate/ALT) allele in hg19

A2: hg19 reference/REF allele

A1.AF: Mean frequency of A1 allele across LL01 and LL02 study stages

P: Unconditioned P-value from linear (bust-size and dysmenorrhea) or logistic (menstrual fever) regression

BETA: Unconditioned beta-coefficient from linear (bust-size and dysmenorrhea) or logistic (menstrual fever) regression

SE: Unconditioned beta-coefficient standard error (SE) from linear (bust-size and dysmenorrhea) or logistic (menstrual fever) regression

### Dataset S1. Peach allergy GWAS summary statistics

File: KhorSS\_Supplementary\_DatasetS1.tds

### Dataset S2. Shrimp allergy GWAS summary statistics

File: KhorSS\_Supplementary\_DatasetS2.tds

## Supplementary Tables

**Table S1. Demographic information for 27 foods**

LL01 control ct.=4225; LL02 control ct.=4125; Total control ct.=8350. Controls' mean age(SD)=32.37(6.7)

| Food group           | Food        | Number of cases |      |           | Cases mean age(SD) | Included in GWAS analysis |
|----------------------|-------------|-----------------|------|-----------|--------------------|---------------------------|
|                      |             | LL01            | LL02 | Total ct. |                    |                           |
| Fruit                | Apple       | 99              | 88   | 187       | 31.88(6.61)        |                           |
|                      | Banana      | 75              | 75   | 150       | 32.33(7.23)        |                           |
|                      | Kiwi        | 271             | 274  | 545       | 32.44(6.56)        | *                         |
|                      | Orange      | 29              | 34   | 63        | 31.00(5.91)        |                           |
| Legumes/grains       | Peach       | 158             | 162  | 320       | 32.44(6.72)        | *                         |
|                      | Sesame      | 11              | 6    | 17        | 35.06(7.11)        |                           |
|                      | Soba        | 85              | 80   | 165       | 31.63(6.15)        |                           |
|                      | Soybean     | 39              | 41   | 80        | 31.60(6.98)        |                           |
| Nuts                 | Wheat       | 36              | 36   | 72        | 32.72(6.88)        |                           |
|                      | Cashew nuts | 21              | 21   | 42        | 32.21(6.54)        |                           |
|                      | Peanut      | 22              | 31   | 53        | 31.62(6.65)        |                           |
|                      | Walnut      | 20              | 28   | 48        | 31.58(5.96)        |                           |
| Vegetables/mushrooms | Matsutake   | 6               | 2    | 8         | 31.00(6.21)        |                           |
|                      | Chinese yam | 307             | 256  | 563       | 33.03(6.65)        | *                         |
| Eggs/dairy           | Egg         | 124             | 147  | 271       | 31.66(6.47)        | *                         |
|                      | Milk        | 56              | 49   | 105       | 33.24(7.24)        |                           |
| Meat/poultry         | Beef        | 18              | 17   | 35        | 33.17(6.10)        |                           |
|                      | Chicken     | 13              | 14   | 27        | 33.00(6.40)        |                           |
|                      | Gelatin     | 4               | 6    | 10        | 35.40(8.40)        |                           |
| Fish                 | Pork        | 11              | 17   | 28        | 35.18(5.73)        |                           |
|                      | Mackerel    | 128             | 124  | 252       | 34.14(6.67)        | *                         |
|                      | Salmon      | 13              | 16   | 29        | 35.17(7.82)        |                           |
| Shellfish            | Salmon roe  | 21              | 24   | 45        | 31.18(6.70)        |                           |
|                      | Abalone     | 16              | 23   | 39        | 34.46(6.30)        |                           |
|                      | Crab        | 214             | 224  | 438       | 33.34(6.44)        | *                         |
|                      | Shrimp      | 268             | 271  | 539       | 33.29(6.82)        | *                         |
|                      | Squid       | 42              | 36   | 78        | 32.82(7.19)        |                           |

Last row of *DRB1-DQB1-DPB1* in Table S2 and S3 is not significant at the locus level but included for completeness.

**Table S2. RPE analysis of HLA haplotypes with peach allergy in Japanese population**

| DRB1~DQB1             | RPE.idx | Locus P-value | OR    | Case Count | Total Count | Case Freq. | Control Count | Total Count | Control Freq. | RPE haplotype P-value |
|-----------------------|---------|---------------|-------|------------|-------------|------------|---------------|-------------|---------------|-----------------------|
| 09:01~03:03           | 0       | 3.30E-12      | 1.684 | 138        | 610         | 0.226      | 2331          | 15756       | 0.148         | 1.15E-07              |
| 14:05~05:03           | 1       | 1.32E-08      | 2.458 | 26         | 472         | 0.055      | 311           | 13425       | 0.023         | 9.38E-06              |
| 15:01~06:02           | 2       | 7.55E-06      | 1.795 | 66         | 446         | 0.148      | 1157          | 13114       | 0.088         | 1.48E-05              |
| 15:02~06:01           | 3       | 1.69E-03      | 1.675 | 82         | 380         | 0.216      | 1687          | 11957       | 0.141         | 4.31E-05              |
| <b>DRB1~DQB1~DPB1</b> |         |               |       |            |             |            |               |             |               |                       |
| 14:05~05:03~05:01     | 0       | 1.84E-07      | 2.227 | 18         | 604         | 0.030      | 212           | 15580       | 0.014         | 9.70E-04              |
| 15:01~06:02~02:01     | 1       | 4.17E-06      | 1.765 | 38         | 586         | 0.065      | 581           | 15368       | 0.038         | 8.79E-04              |
| 09:01~03:03~05:01     | 2       | 8.19E-05      | 1.521 | 64         | 548         | 0.117      | 1183          | 14787       | 0.080         | 1.98E-03              |
| 15:02~06:01~09:01     | 3       | 8.04E-04      | 1.540 | 69         | 484         | 0.143      | 1326          | 13604       | 0.097         | 1.10E-03              |
| 09:01~03:03~02:01     | 4       | 0.0103        | 1.768 | 47         | 415         | 0.113      | 827           | 12278       | 0.067         | 2.82E-04              |
| 15:01~06:02~05:01     | 5       | 0.2171        | 1.742 | 19         | 368         | 0.052      | 347           | 11451       | 0.030         | 0.0201                |

**Table S3. RPE analysis of HLA haplotypes with shrimp allergy in Japanese population**

| DRB1~DQB1             | RPE.idx | Locus P-value | OR    | Case Count | Total Count | Case Freq. | Control Count | Total Count | Control Freq. | RPE haplotype P-value |
|-----------------------|---------|---------------|-------|------------|-------------|------------|---------------|-------------|---------------|-----------------------|
| 04:05~04:01           | 0       | 2.09E-14      | 1.990 | 233        | 1016        | 0.229      | 2050          | 15756       | 0.130         | 3.92E-19              |
| 15:01~06:02           | 1       | 0.039         | 1.552 | 98         | 783         | 0.125      | 1157          | 13706       | 0.084         | 8.07E-05              |
| <b>DRB1~DQB1~DPB1</b> |         |               |       |            |             |            |               |             |               |                       |
| 04:05~04:01~05:01     | 0       | 9.44E-10      | 1.836 | 135        | 992         | 0.136      | 1231          | 15580       | 0.079         | 2.33E-10              |
| 04:05~04:01~02:01     | 1       | 1.00E-03      | 2.118 | 32         | 857         | 0.037      | 258           | 14349       | 0.018         | 5.70E-05              |
| 04:05~04:01~04:02     | 2       | 0.081         | 1.658 | 29         | 825         | 0.035      | 303           | 14091       | 0.022         | 9.80E-03              |

## Supplementary Worksheets

Available in KhorSS\_SupplementaryWorksheets.xlsx

First four worksheets in file contain Legends with descriptions of individual columns in the following worksheets.

### **Worksheet S1. Summary of GWAS statistics and annotations for association signals**

Descriptive information, aggregated statistics, and annotations of association signals.

### **Worksheet S2. GWAS statistics and annotation of top peach allergy associated SNPs**

Descriptive information, statistics, and annotation of top peach allergy associated SNPs

### **Worksheet S3. GWAS statistics and annotation of top shrimp allergy associated SNPs**

Descriptive information, statistics, and annotation of shrimp allergy associated SNPs

### **Worksheet S4. Summary of top genes for eQTLs that overlap food allergy associated variants**

Significant SNP-gene eQTL associations from HGVD and GTExPortal were filtered for SNPs that were in at least moderate LD ( $r^2 > 0.5$  |  $r^2_{equiv} > 0.5$ ) to either the top peach (rs28359884) or shrimp (rs74995702) associated SNP. Then, they were filtered for SNPs that we labelled as valid eQTLs in both HGVD and GTExPortal: 1) HGVD associations with HGVD  $R^2 > 0.1$  and  $RSS > 0.2$ , 2) GTEx  $max.RSS > 0.2$ . For each set, the table compares the mean  $\beta$ -coefficient of the peach or shrimp allergy logistic regression with those from the GTEx and HGVD eQTL analyses. Columns are grouped summarising across all SNPs or for those with both GTEx and HGVD eQTL values.

### **Worksheet S5. Summary of eQTLs that overlap peach allergy associated SNPs**

### **Worksheet S6. Summary of eQTLs that overlap shrimp allergy associated SNPs**

We overlapped eQTL SNPs for GTExPortal ( $max.RSS > 0.2$ ) and HGVD (HGVD  $r^2 > 0.1$  and HGVD  $RSS > 0.2$ ) with the SNPs that were in moderate LD to each peach or shrimp allergy associated locus' top SNP and show the eQTL gene, eQTL tissues, eQTL slope, and GWAS beta-coefficient. Both the slope and beta-coefficient measure effect of A1 (Alternate GRCh37/hg19) allele. Imputation was not performed by HGVD (all SNPs from Illumina Omni5Exome beadchip), so many of the SNPs that were associated in both the GWAS and GTEx Portal datasets are missing HGVD values at the top variants, while missing values for GTExPortal data are generally due to the pre-filtering that was applied to the original tables. Data shown is for: 1) genes that had at least one SNP that was an eQTL in  $\geq 10$  GTEx Portal Tissues or identified in HGVD (only a single tissue analysed), 2) only for HLA-genes.

## Supplementary Figures

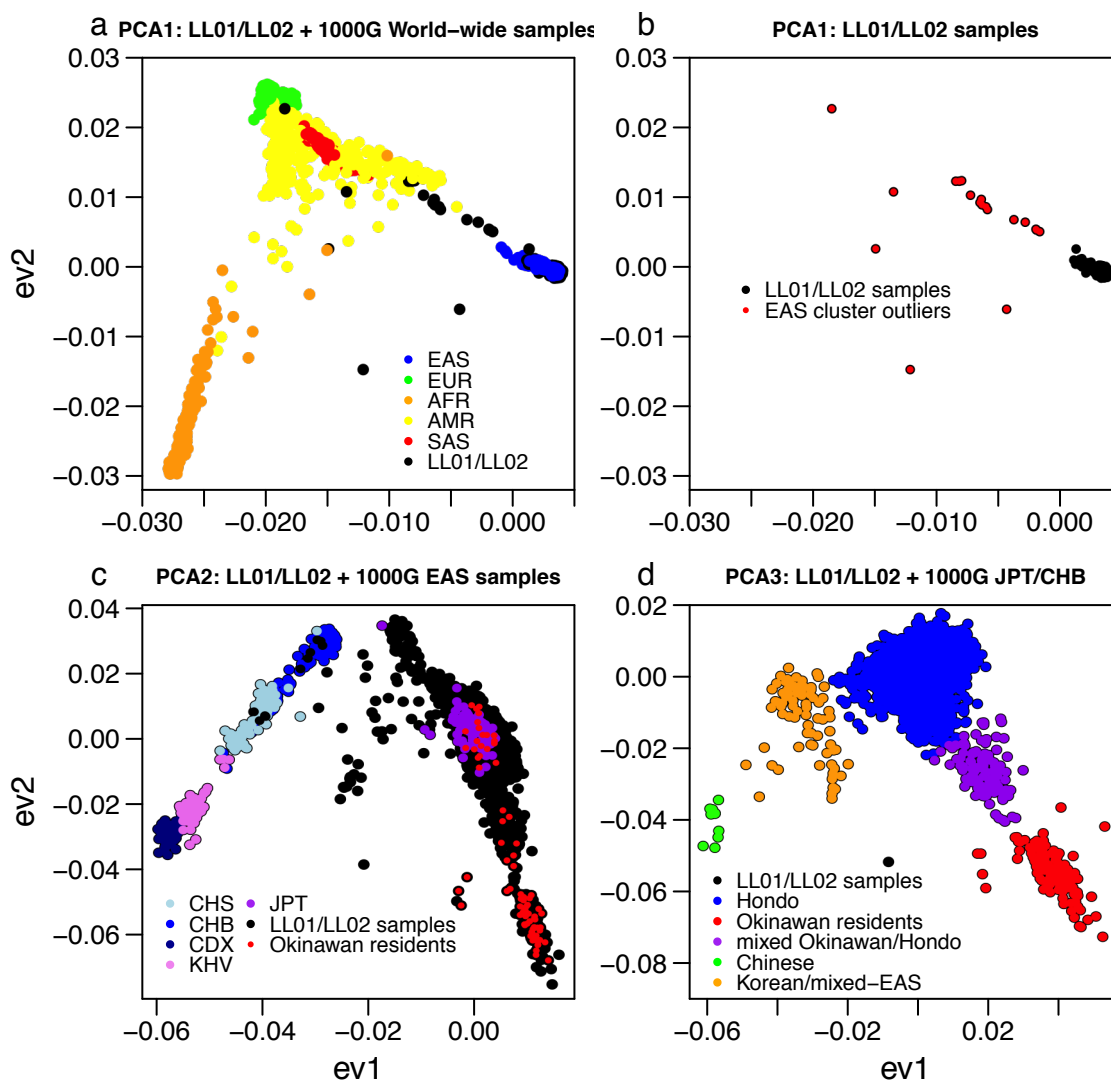

### Figure S1. Population structure analysis

PCA was performed in three runs, with PCA1 combining LL01+LL02 and 1000G world-wide samples, PCA2 combining LL01+LL02 (minus non-Asian outliers) with 1000G Asian samples, and PCA3 combining LL01+LL02 with 1000G JPT/CHB samples. **Panel a)** PCA1, **Panel b)** PCA1 zoomed to LL01+LL02 samples, **Panel c)** PCA2, and **Panel d)** PCA3.

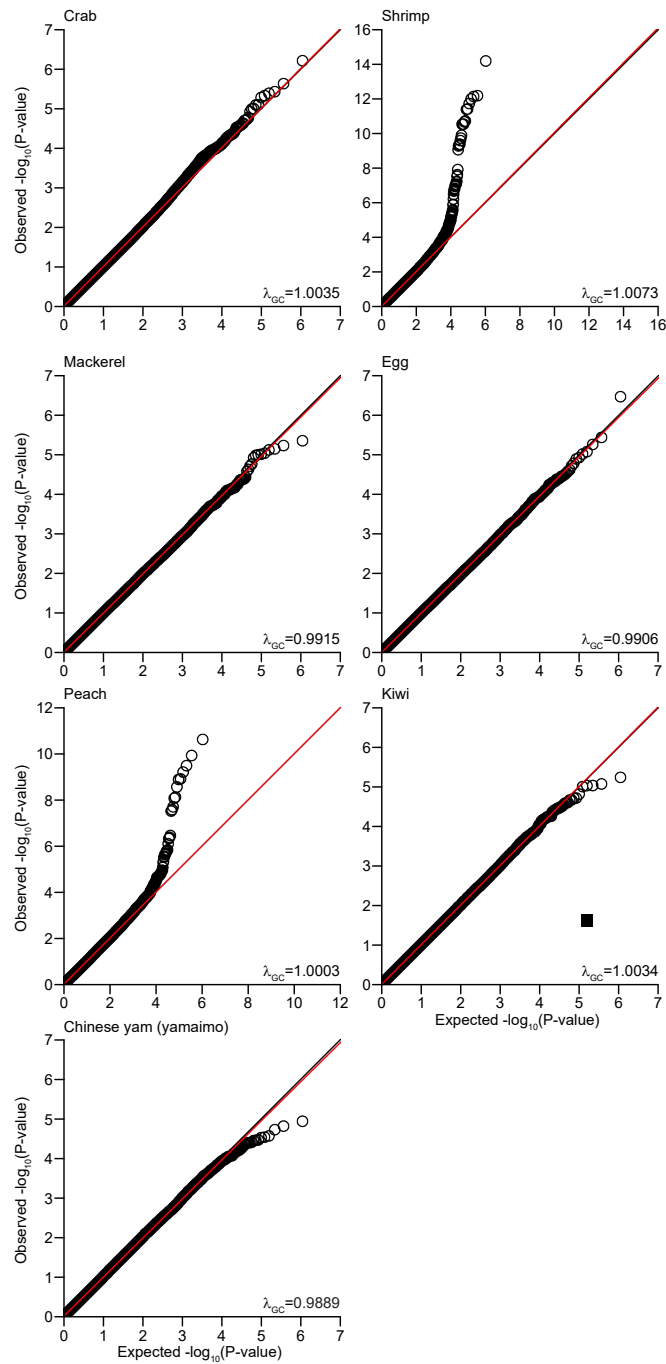

**Figure S2. QQ plots of genome-wide meta-analysis association statistics**

QQ plot of expected and observed  $-\log_{10}(P_{meta})$  for genotyped GWAS statistics for seven foods with >100 samples in both LL01 and LL02 sample-sets.  $\lambda_{GC}$  was calculated as the median of the observed  $\chi^2$  test statistics divided by the median of test statistics assuming a uniform distribution. Black line has slope of 1.0. Red line has slope of  $\lambda_{GC}$ .

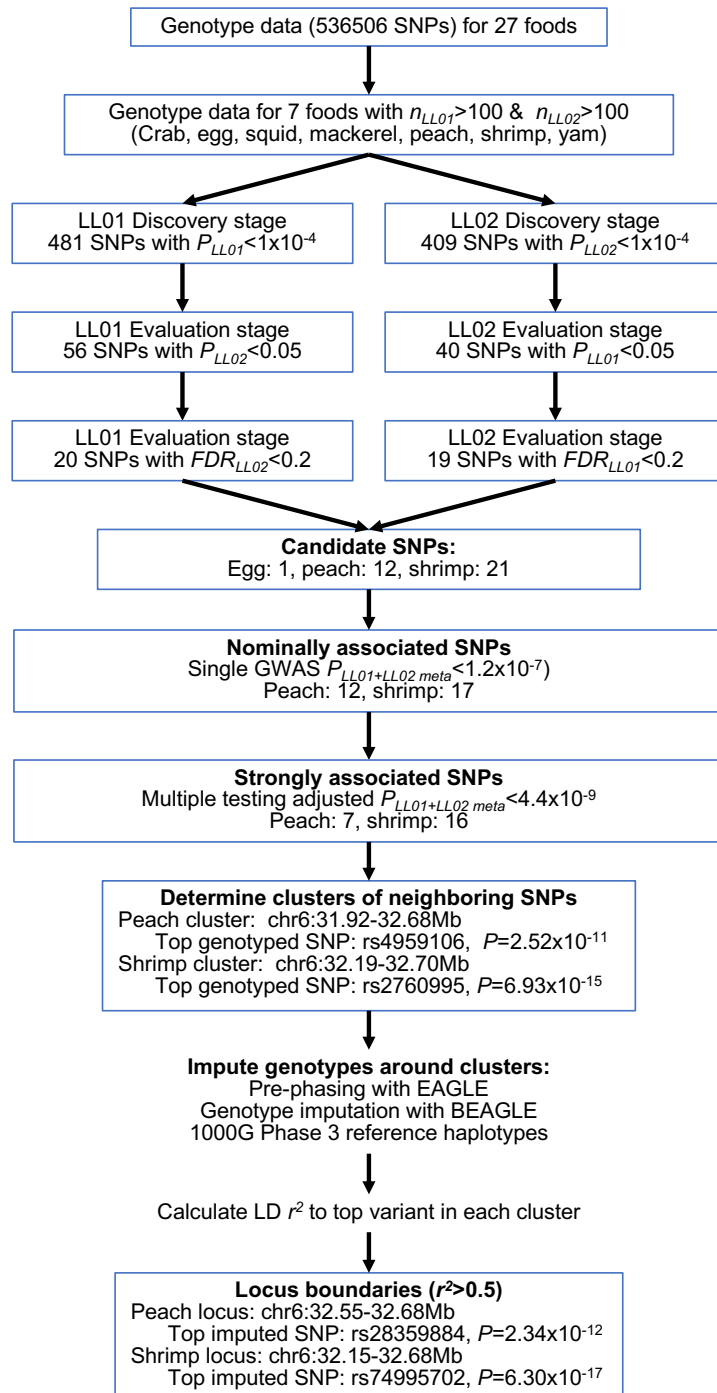

Figure S3. Study design flowchart



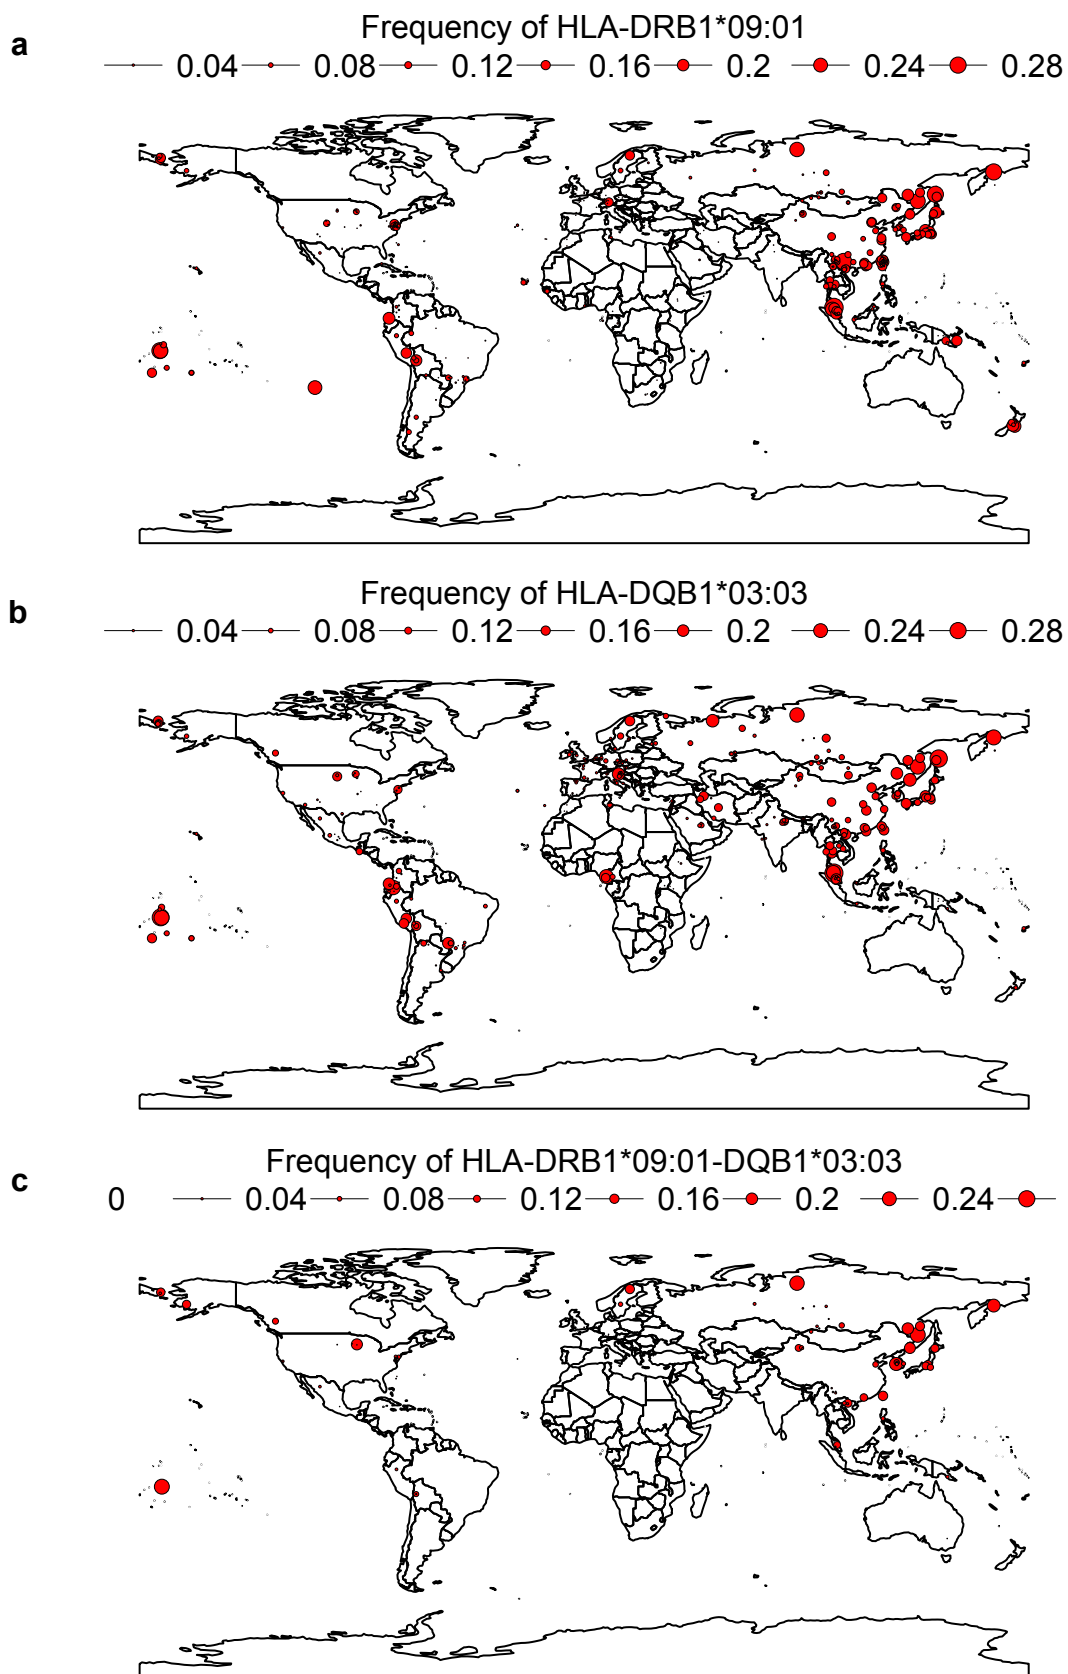

**Figure S4. World distribution of top peach allergy associated HLA alleles and haplotype.**

Plotted using the R *rworldmap* package Ver.1.3-4 with HLA allele and haplotype data from <http://www.allelefreqencies.net>. Population samples in the same location were sorted by frequency and jittered to allow better visualisation. **Panel a)** *HLA-DRB1\*09:01*, **Panel b)** *HLA-DQB1\*03:03*, and **Panel c)** *HLA-DRB1\*09:01~HLA-DQB1\*03:03*.

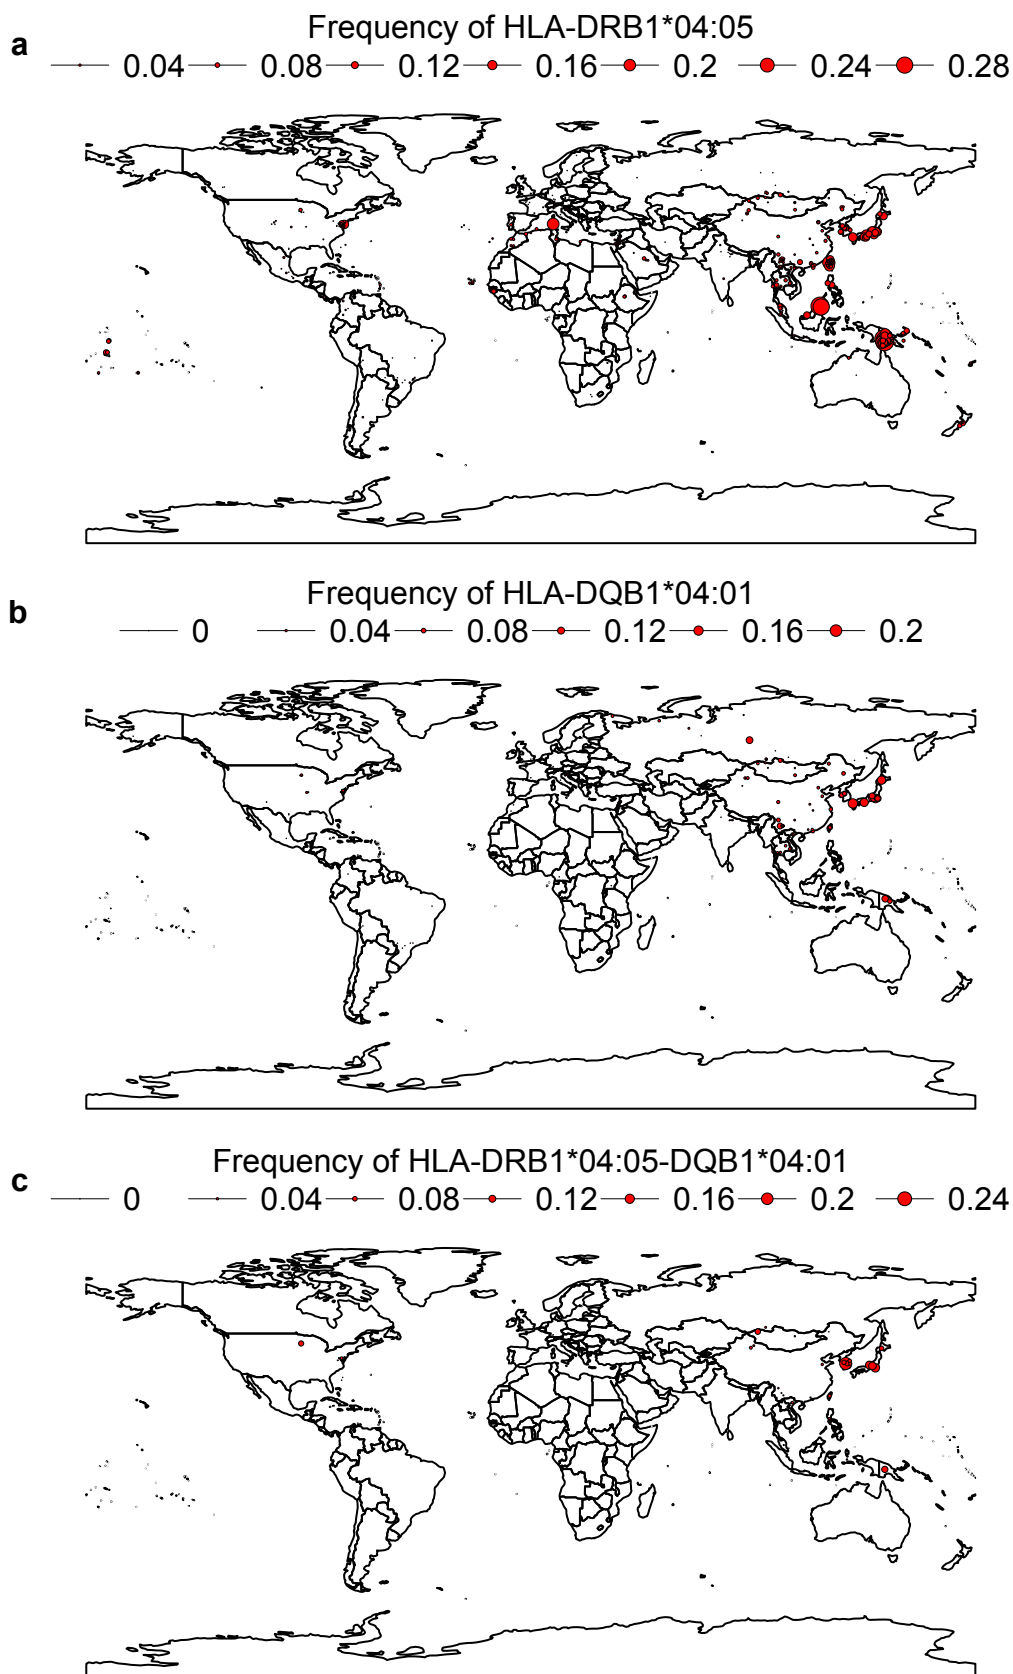

**Figure S5. World distribution of top shrimp allergy associated HLA alleles and haplotype.**

Plotted using the R *rworldmap* package Ver.1.3-4 with HLA allele and haplotype data from <http://www.allelefrequencies.net>: Population samples in the same location were sorted by frequency and jittered to allow better visualisation. **Panel a)** *HLA-DRB1\*04:05*, **Panel b)** *HLA-DQB1\*04:01*, and **Panel c)** *HLA-DRB1\*04:05~HLA-DQB1\*04:01*

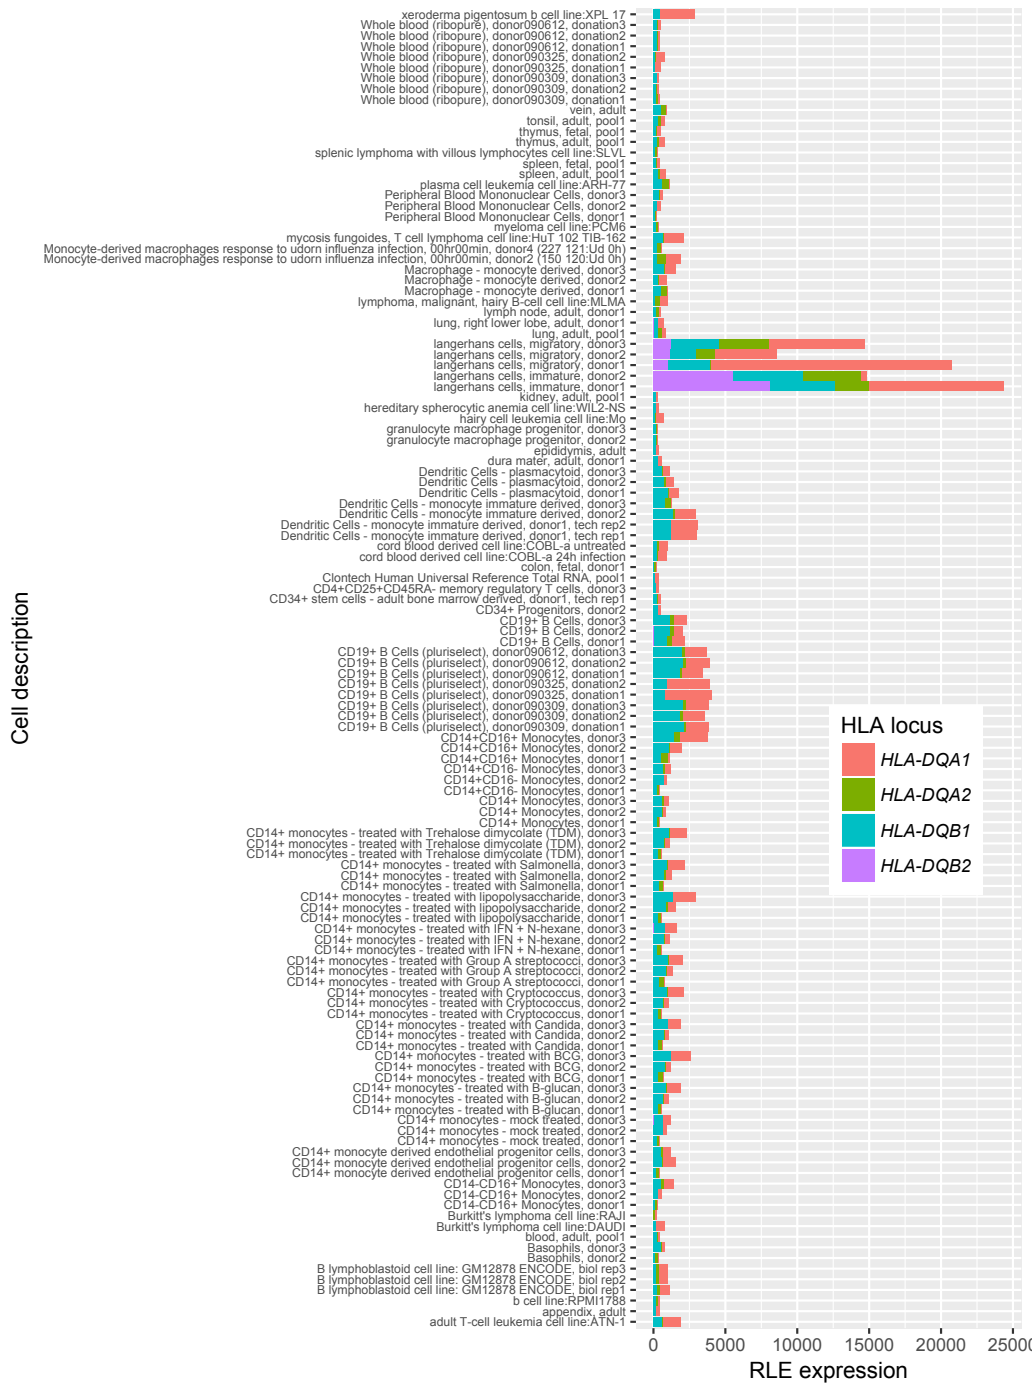

**Figure S6. *HLA-DQA2* and *HLA-DQB2* expression is largely restricted to Langerhans cells.**

FANTOM5 Phase 1 CAGE RLE expression values for *HLA-DQA1*, *HLA-DQB1*, *HLA-DQA2*, and *HLA-DQB2* were downloaded from <http://fantom.gsc.riken.jp/zenbu/gLyphs/#config=ONHzqgf2E5Xtmnpsh2gURB> and filtered for tissues that were in the upper-quartile of tissues expressing a particular gene (UQ calculated across tissue samples with RLE>0). The merged table of HLA gene vs. tissue expression was then further filtered for tissues that expressed at least two of the four genes. *HLA-DQB2* expression is only expressed in Langerhans cells, while *HLA-DQA2* expression is mostly restricted to Langerhans cells, with only limited expression in other cell types.
